# Supplementary material for: Ionic liquid-mediated low-temperature formation of hexagonal titanium-oxyhydroxyfluoride particles
Source: Royal Society of Chemistry journal article supplement (doi:10.1039/c9ce01536a), 2019-11-22
Supplement: c9ce01536a1.pdf [file c9ce01536a1.pdf]

## Electronic Supplementary Information (ESI) Ionic Liquid-Mediated Low-Temperature Formation of Hexagonal Titanium- Oxyhydroxyfluoride Particles

Pascal Voepel,<sup>a</sup> Melanie Sieland,<sup>a</sup> Junpei Yue,<sup>a,b</sup> Igor Djerdj<sup>c</sup> and Bernd M. Smarsly<sup>\*a,d</sup>

<sup>a</sup>Institute of Physical Chemistry, Justus Liebig University, Heinrich-Buff-Ring 17, D-35392 Giessen, Germany

<sup>b</sup>Key Laboratory of Molecular Nanostructure and Nanotechnology, Institute of Chemistry Chinese Academy of Sciences (ICCAS)

No.2,1st North Street, Zhongguancun  
Beijing 100190, P. R. China

<sup>c</sup>Josip Juraj Strossmayer University of Osijek, Department of Chemistry, Cara Hadrijana 8/A, 31000 Osijek, Croatia

<sup>d</sup>Center of Materials Research, Justus Liebig University, Heinrich-Buff-Ring 16, D-35392 Giessen, Germany

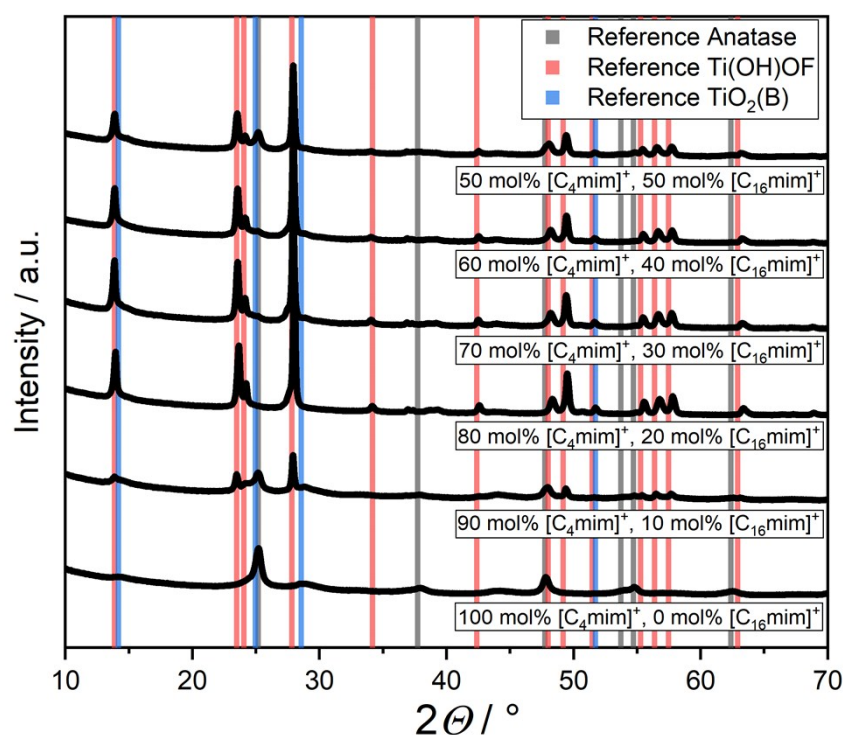

**Figure S1** XRD patterns of the resulting products after the synthesis with different mixtures of ionic liquids.

**Table S 1** Crystallographic data and refinement parameters.

|                                                                      | <b>Ti(OH)OF · 0.66 H<sub>2</sub>O</b>      | <b>TiO<sub>2</sub>(B)</b>                                                                |
|----------------------------------------------------------------------|--------------------------------------------|------------------------------------------------------------------------------------------|
| <b>Space group</b>                                                   | <i>P6<sub>3</sub>cm</i> (185)              | <i>C2/m</i> (12)                                                                         |
| <b>Molecular weight (g/mol)</b>                                      | 111.76                                     | 79.87                                                                                    |
| <b>Z</b>                                                             | 6                                          | 8                                                                                        |
| <b>Crystal system</b>                                                | Hexagonal                                  | Monoclinic                                                                               |
| <b>Lattice parameters (Å)</b>                                        | <i>a</i> = 7.3866(5), <i>c</i> = 7.5697(5) | <i>a</i> = 12.670(4), <i>b</i> = 3.7711(11),<br><i>c</i> = 6.141(2), $\beta$ = 106.36(4) |
| <b>Cell volume (Å<sup>3</sup>)</b>                                   | 357.68(4)                                  | 281.54(2)                                                                                |
| <b>Calculated density (g cm<sup>-3</sup>)</b>                        | 3.088                                      | 3.769                                                                                    |
| <b>Data collection range</b>                                         | 10° - 75°                                  |                                                                                          |
| <b>No. of parameters refined</b>                                     | 85                                         |                                                                                          |
| <b>No. of bond lengths restrained</b>                                | 20                                         | 18                                                                                       |
| <b>No. of bond angles restrained</b>                                 | 0                                          | 0                                                                                        |
| <b>Average apparent crystallite size (nm)</b>                        | 26.0(8)                                    | 8.9(1)                                                                                   |
| <b>Phase composition (wt%)</b>                                       | 72.7(2.0)                                  | 27.3(2.3)                                                                                |
| <b>R<sub>B</sub> (%)</b>                                             | 8.04                                       | 8.23                                                                                     |
| <b>Conventional R<sub>p</sub>, R<sub>wp</sub>, R<sub>e</sub> (%)</b> | 20.8, 21.2, 4.85                           |                                                                                          |
| <b>GoF</b>                                                           | 4.3                                        |                                                                                          |

**Table S 2** Selected interatomic distances for Ti(OH)OF · 0.66 H<sub>2</sub>O.

|               | <b>Bond length (Å)</b> |
|---------------|------------------------|
| <b>Ti1-F1</b> |                        |
| <b>x1</b>     | 1.860(9)               |
| <b>x1</b>     | 1.929(9)               |
| <b>Ti1-O1</b> |                        |
| <b>x2</b>     | 1.938(7)               |
| <b>x2</b>     | 1.976(6)               |

**Table S 3** Distortion of coordination polyhedral ( $\delta$ ) and valences ( $\sum S_{ij}$ ) of the atoms in Ti(OH)OF · 0.66 H<sub>2</sub>O.

| <b>Atom</b> | <b><math>\delta</math> (x10<sup>-4</sup>)</b> | <b><math>\sum S_{ij}</math></b> |
|-------------|-----------------------------------------------|---------------------------------|
| <b>Ti1</b>  | 4.042                                         | 4.12(3)                         |
| <b>O1</b>   | 174.081                                       | 1.64(1)                         |
| <b>F1</b>   | 3.375                                         | 1.39(2)                         |

**Table S 4** Structural parameters for Ti(OH)OF · 0.66 H<sub>2</sub>O. The refined occupancies are expressed in terms of the ratio m/M: site multiplicity/multiplicity of a general position.

| <b>Atom</b> | <b>Wyckoff position</b> | <b>x</b>  | <b>y</b>  | <b>z</b>  | <b>B(Å<sup>2</sup>)</b> | <b>Occupancy</b> |
|-------------|-------------------------|-----------|-----------|-----------|-------------------------|------------------|
| <b>Ti1</b>  | 6c                      | 0         | 0.5111(7) | 0.8551(9) | 0.20(2)                 | 0.50000          |
| <b>O1</b>   | 12d                     | 0.1910(5) | 0.4049(6) | 0.883(1)  | 0.39(3)                 | 1.00000          |
| <b>F1</b>   | 6c                      | 0         | 0.505(1)  | 1.1007(7) | 1.82(4)                 | 0.50000          |
| <b>O2</b>   | 2a                      | 0         | 0         | 0.8510(9) | 0.39(3)                 | 0.16667          |
| <b>O3</b>   | 2a                      | 0         | 0         | 1.1002(9) | 0.39(3)                 | 0.16667          |

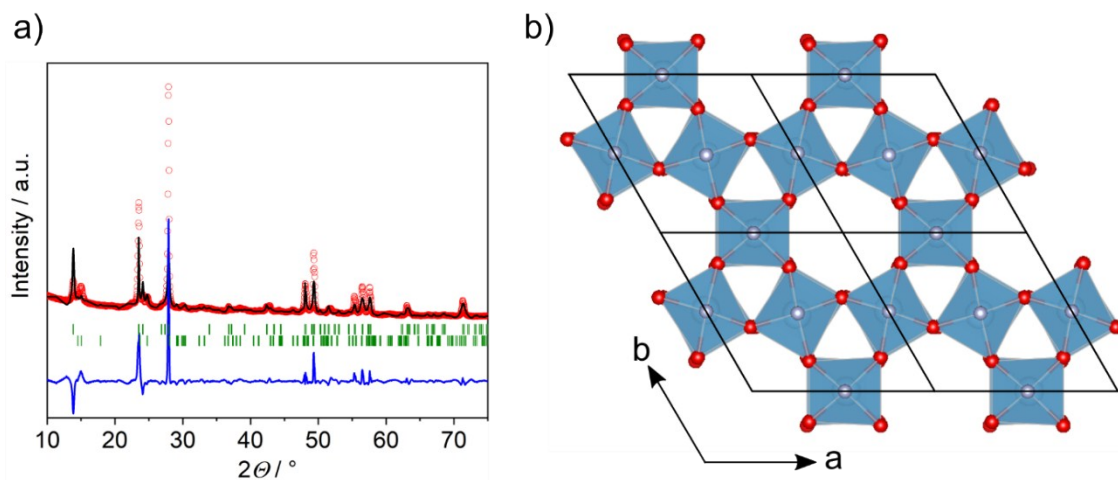

**Figure S2** a) Rietveld refinement of structure b) without crystalline water inside of the channels.

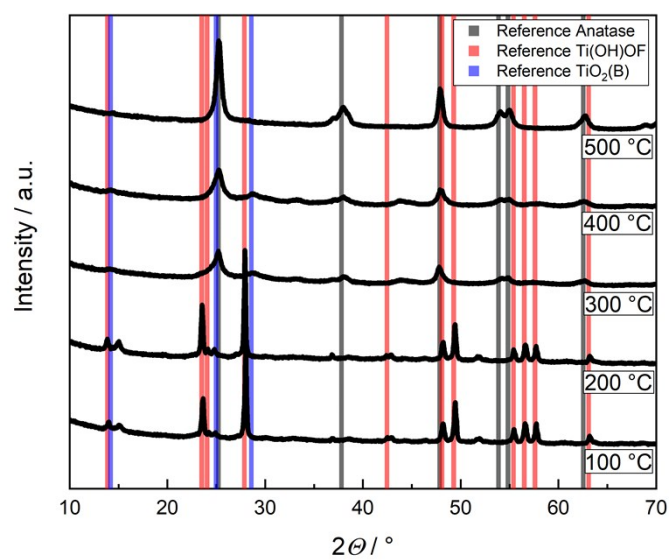

**Figure S3** PXRD patterns of the product which was heated up to different temperatures.
